# Supplementary material for: Structural insights into SETD3-mediated histidine methylation on β-actin
Source: eLife journal article supplement (doi:10.7554/elife.43676), 2019-02-20
Supplement: supp [file elife-43676-supp-v1.zip]

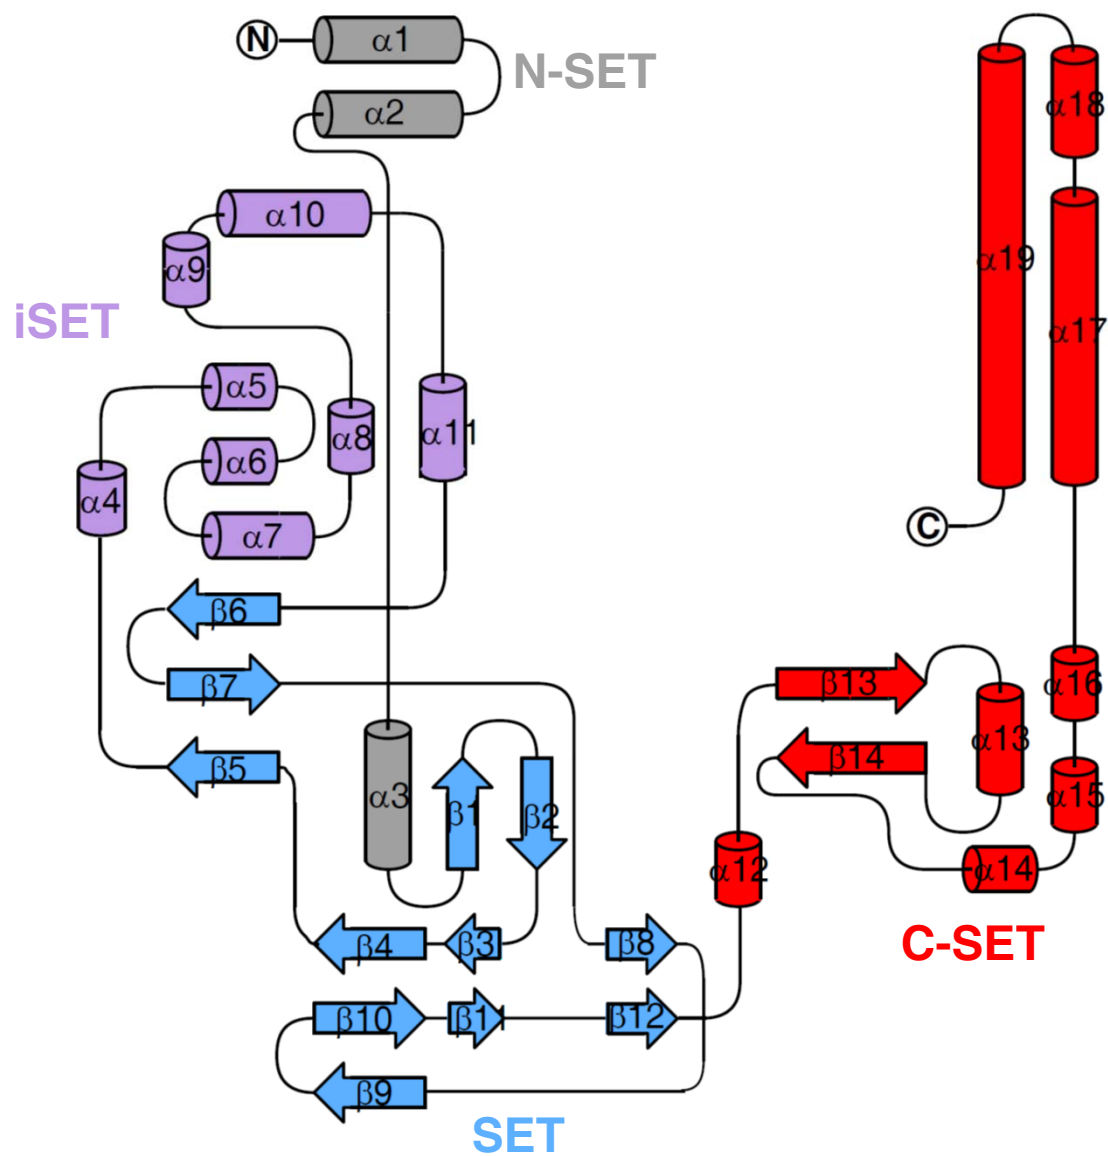

Topology of SETD3 (2-502), with secondary structures marked and colored in the same way as shown in Figure 1–figure supplement 2A.

**Figure 1–figure supplement 3**
