# Supplementary material for: Structural insights into SETD3-mediated histidine methylation on β-actin
Source: eLife journal article supplement (doi:10.7554/elife.43676), 2019-02-20
Supplement: supp [file elife-43676-supp-v1.zip]

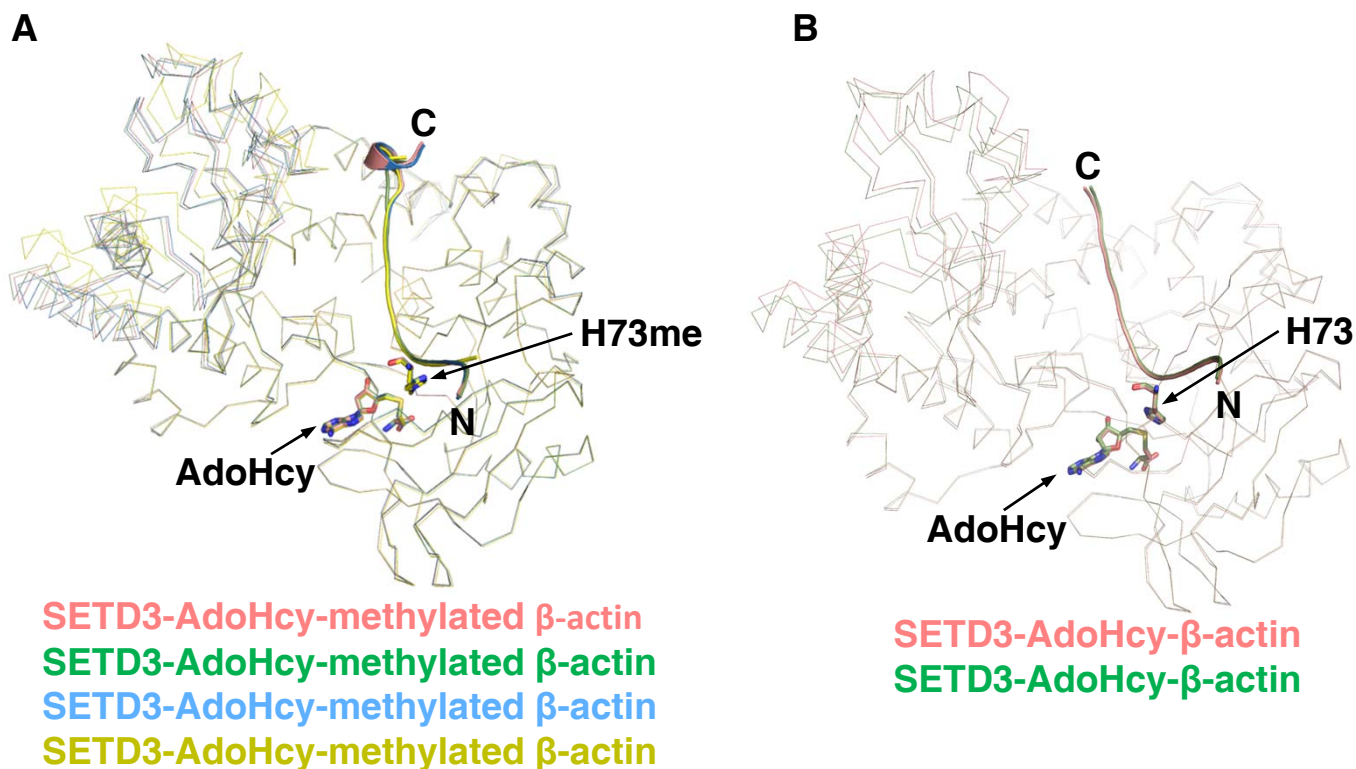

**Superposition of SETD3 molecules.** (A) Superposition of four SETD3 molecules bound to methylated  $\beta$ -actin in the same asymmetric unit, with the four molecules shown in red, green, blue and yellow ribbon, respectively. His73me of  $\beta$ -actin and AdoHcy are shown in sticks. (B) Superposition of two molecules of SETD3 bound to unmodified  $\beta$ -actin in the same asymmetric unit, with the two molecules shown in red and green ribbon, respectively. His73 of  $\beta$ -actin and AdoHcy are shown in sticks.

**Figure 1—figure supplement 4**
