# Supplementary material for: Structural insights into SETD3-mediated histidine methylation on β-actin
Source: eLife journal article supplement (doi:10.7554/elife.43676), 2019-02-20
Supplement: supp [file elife-43676-supp-v1.zip]

Archive with 16 entries (16 files):
- elife_poa_e43676_Figure_1_figure_supplement_4.pdf
- elife_poa_e43676_Figure_2_figure_supplement_2.pdf
- elife_poa_e43676_Figure_1_figure_supplement_2.pdf
- elife_poa_e43676_Table_3_source_data_2.xlsx
- elife_poa_e43676_Figure_1_figure_supplement_7.pdf
- elife_poa_e43676_Figure_2_figure_supplement_1.pdf
- elife_poa_e43676_Figure_1_figure_supplement_6.pdf
- elife_poa_e43676_Figure_1_figure_supplement_1.pdf
- elife_poa_e43676_Supplementary_file_1.pdf
- elife_poa_e43676_Figure_2_figure_supplement_3.pdf
- elife_poa_e43676_Table_3_source_data_1.xlsx
- elife_poa_e43676_Figure_1_figure_supplement_3.pdf
- elife_poa_e43676_Figure_3_source_data_1.xlsx
- elife_poa_e43676_Transparent_Reporting_File.pdf
- elife_poa_e43676_Figure_1_figure_supplement_5.pdf
- elife_poa_e43676_Figure_1_figure_supplement_8.pdf
