# Supplementary material for: Structural insights into SETD3-mediated histidine methylation on β-actin
Source: eLife journal article supplement (doi:10.7554/elife.43676), 2019-02-20
Supplement: supp [file elife-43676-supp-v1.zip]

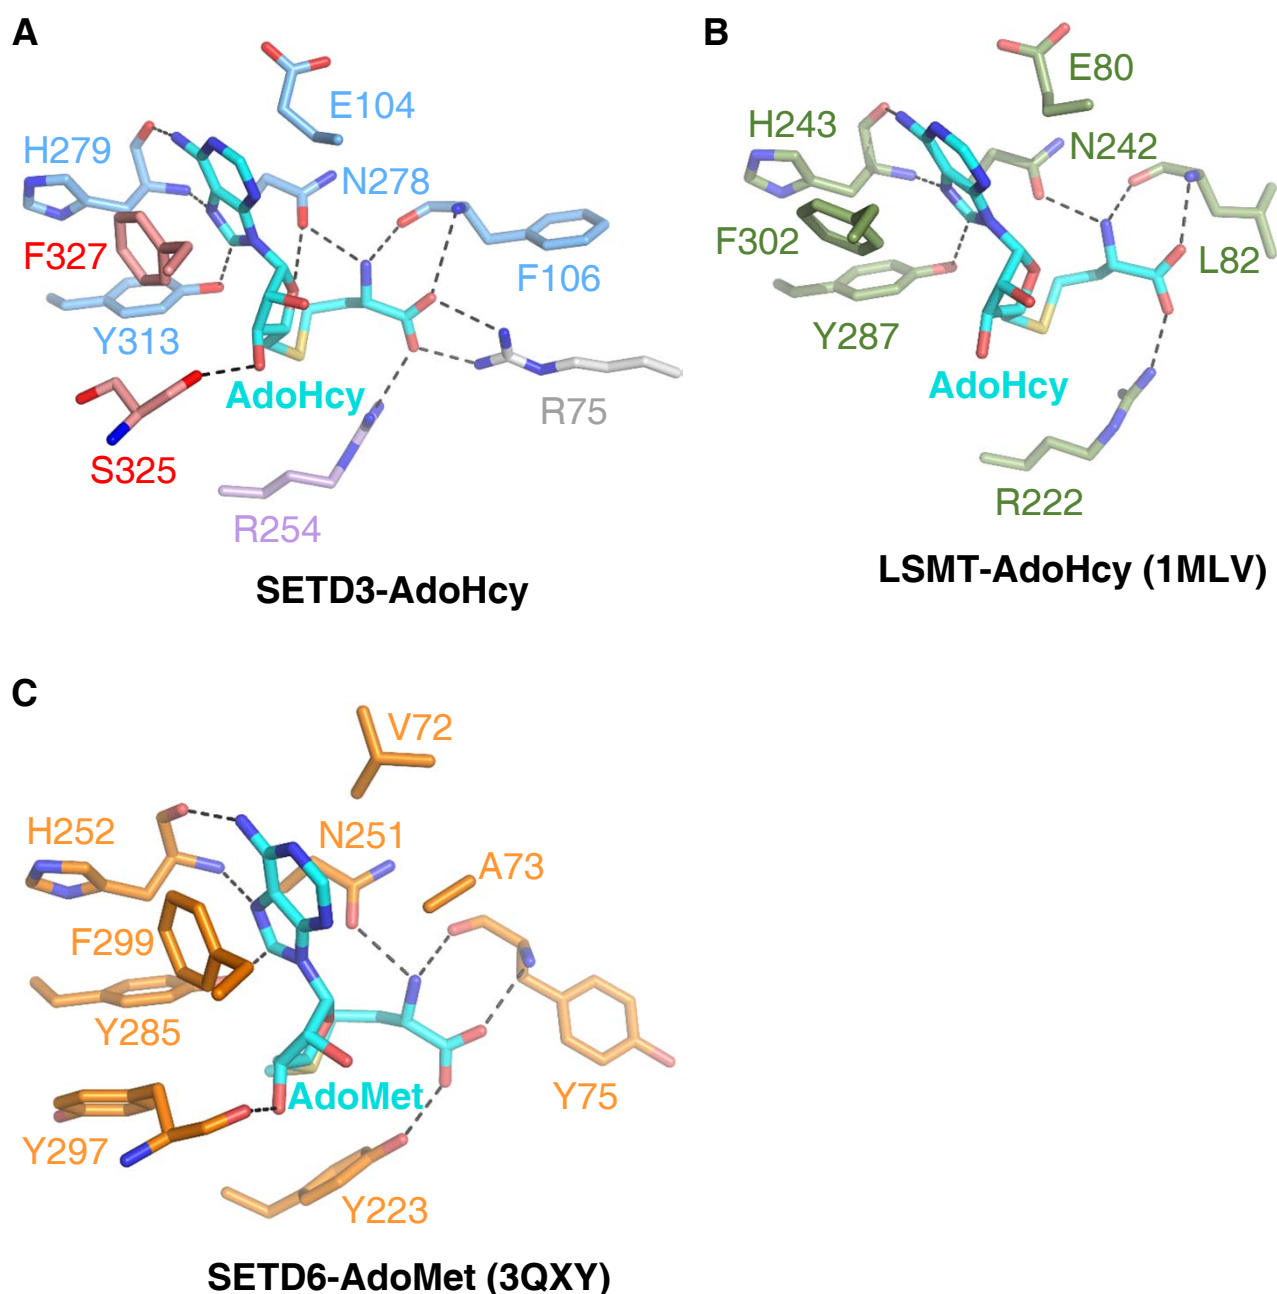

**Comparison of AdoHcy binding mode of SETD3 with those observed in LSMT and SETD6.** (A) A detailed depiction of intermolecular interactions between SETD3 and AdoHcy, with AdoHcy shown in cyan sticks, and the AdoHcy binding residues of SETD3 shown in sticks and colored in the same mode as in Figure 1A. (B) Detailed interactions between AdoHcy and LSMT (PDB id: 1MLV), with AdoHcy binding residues of LSMT and AdoHcy shown in green and cyan sticks, respectively. (C) Detailed interactions between AdoMet and SETD6 (PDB id: 3QXY), with AdoMet binding residues of SETD6 and AdoMet shown in orange and cyan sticks, respectively. In Figures 2B and 2C, hydrogen bonds are indicated by black dashes.

**Figure 1—figure supplement 6**
