# Supplementary material for: Structural insights into SETD3-mediated histidine methylation on β-actin
Source: eLife journal article supplement (doi:10.7554/elife.43676), 2019-02-20
Supplement: supp [file elife-43676-supp-v1.zip › elife_poa_e43676_Figure_1_figure_supplement_1.pdf]

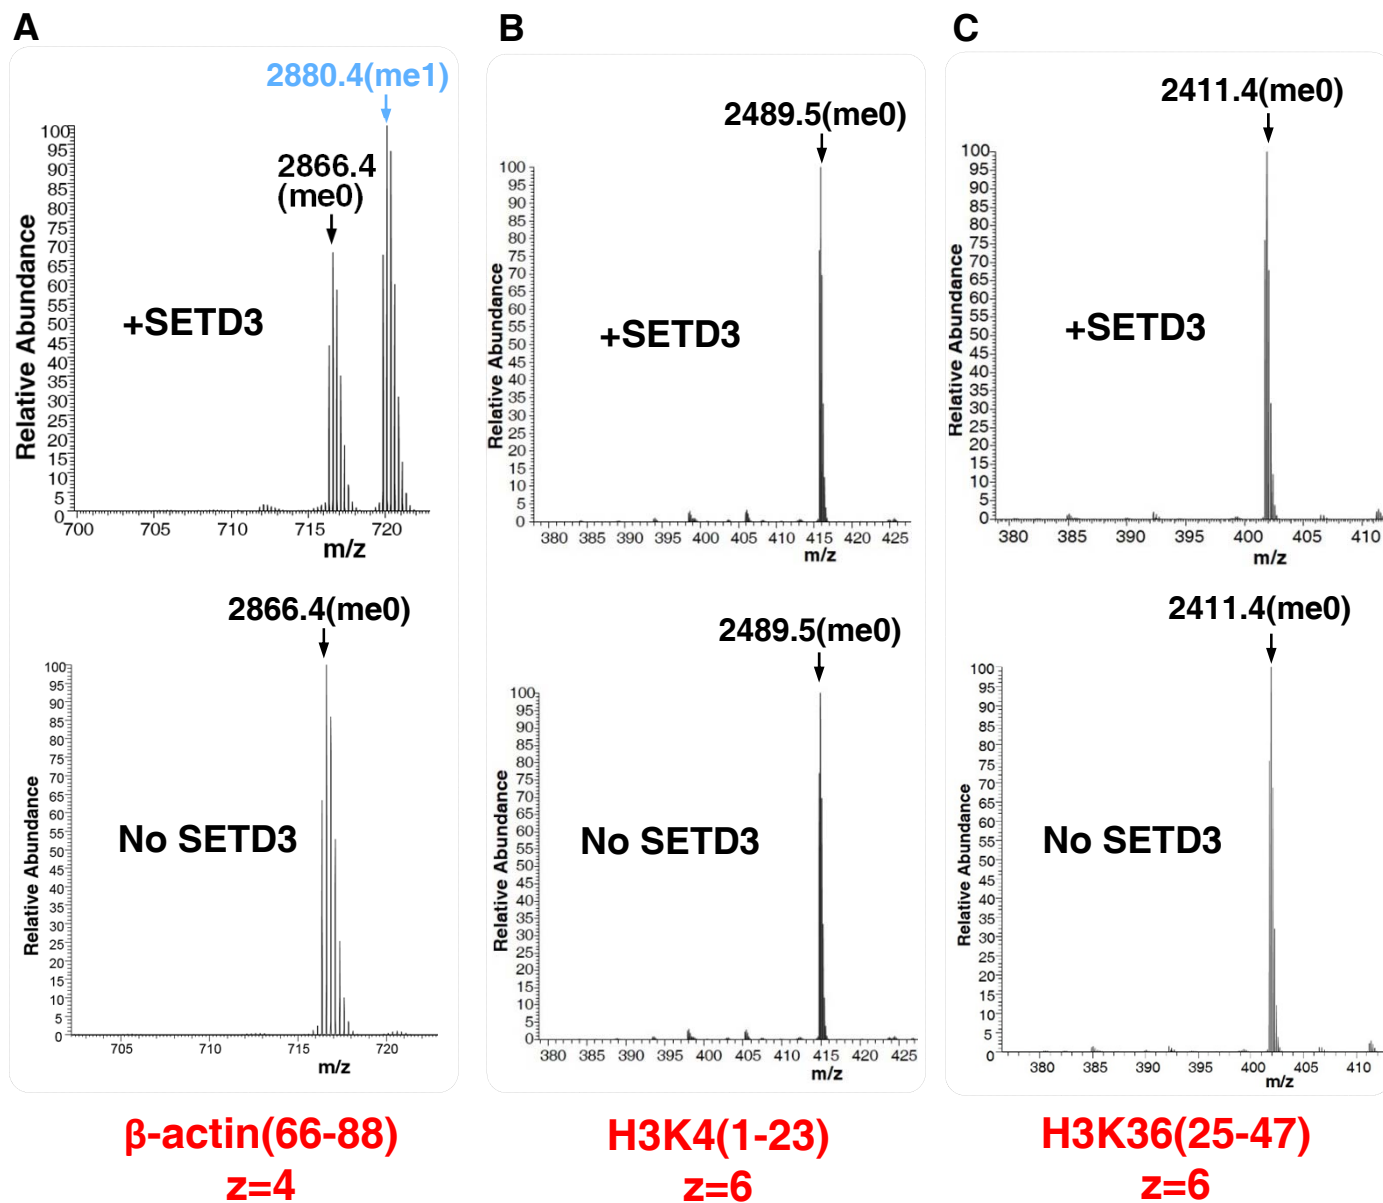

Figure 1–figure supplement 1 (To be continued)

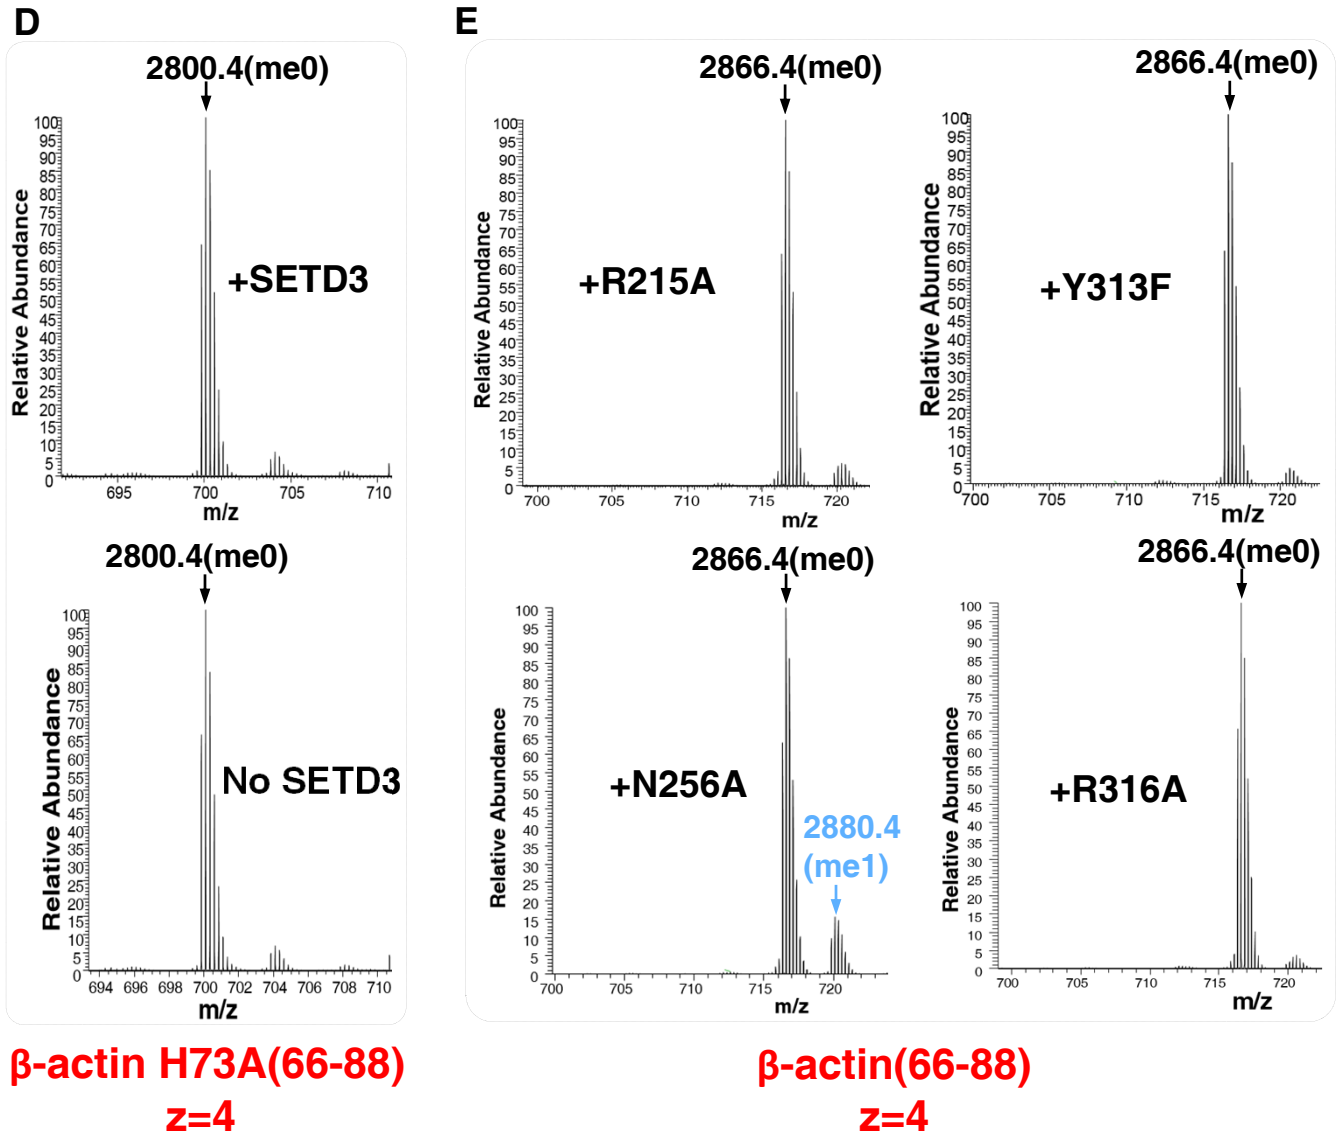

Mass Spectrometry data showing the activity of SETD3 towards different peptides. Core region of SETD3 (2-502) methylates (A) the  $\beta$ -actin peptide (aa 66-88), but not (B) H3K4 (1-23), (C) H3K36 (25-47), or (D)  $\beta$ -actin H73A(66-88) (E) The activity of SETD3 mutants on the  $\beta$ -actin peptide (66-88).

Figure 1–figure supplement 1
