# Supplementary material for: Structural insights into SETD3-mediated histidine methylation on β-actin
Source: eLife journal article supplement (doi:10.7554/elife.43676), 2019-02-20
Supplement: supp [file elife-43676-supp-v1.zip › elife_poa_e43676_Figure_1_figure_supplement_2.pdf]

# B

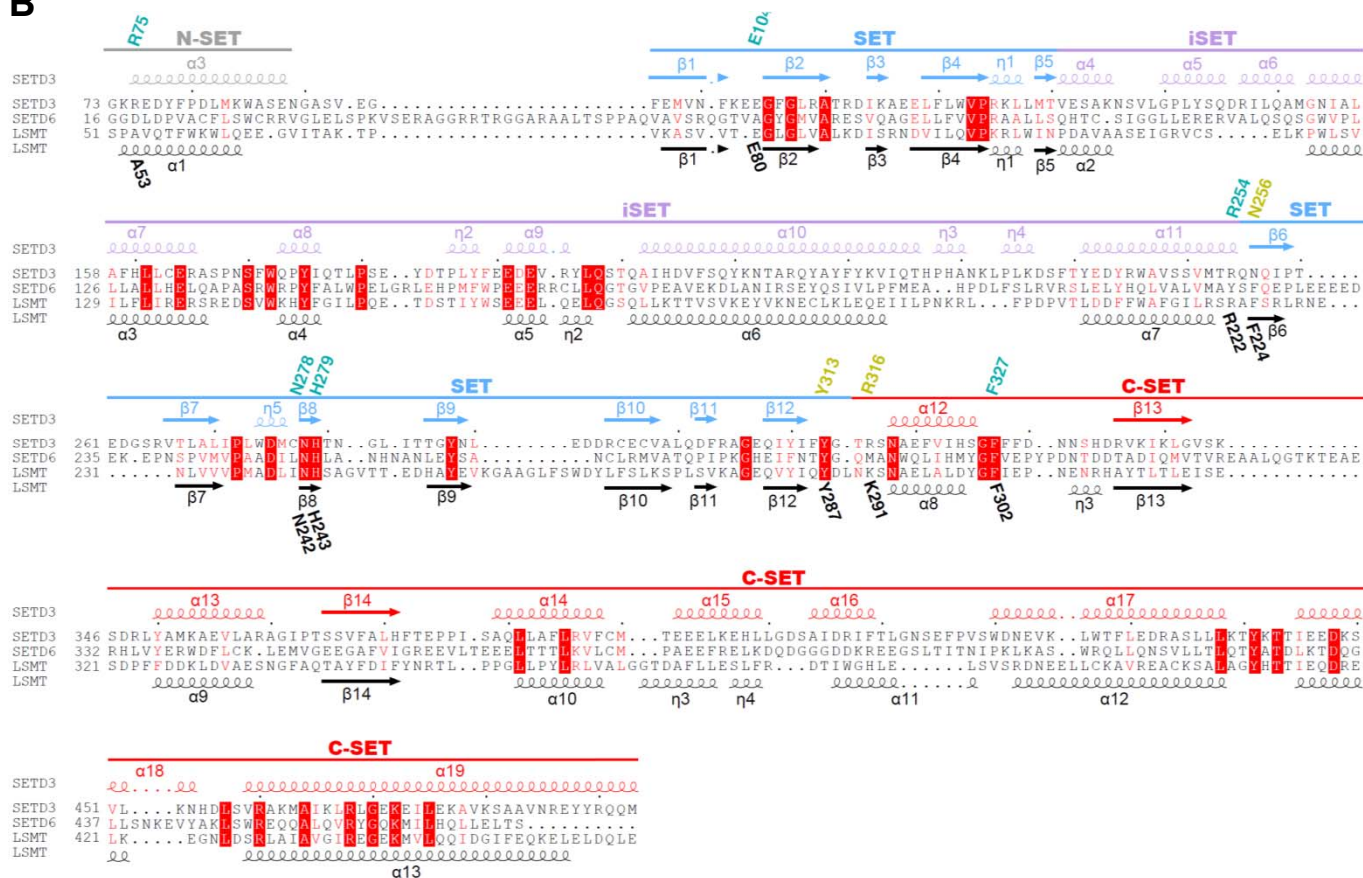

**Sequence alignment of human SETD3 with its orthologs or other SET domain proteins (SETD6 and LSM1).** (A) Sequence alignment of Human SETD3(Hs, NP\_115609.2), mouse SETD3(Ms, NP\_082538.2), *Xenopus* SETD3(Xs, NP\_001016577), Zebrafish SETD3 (Zb, NP\_956348.1) and *Drosophila* (Dr, XP\_017048262.1). The secondary structures of human SETD3 are colored in the same way as shown in Figure 1A. The residues involved in binding to AdoHcy and His73 are labeled in cyan and yellow, respectively. (B) Sequence alignment of human SETD3, human SETD6 (NP\_001153777.1) and *Pisum sativum* LSM1 (AAA69903.1). The secondary structures, AdoHcy binding residues, and His73 binding residues, are labeled in the same way as shown in Figure 1—figure supplement 2A.

### Figure 1–figure supplement 2
