# Supplementary material for: Structural insights into SETD3-mediated histidine methylation on β-actin
Source: eLife journal article supplement (doi:10.7554/elife.43676), 2019-02-20
Supplement: supp [file elife-43676-supp-v1.zip › elife_poa_e43676_Figure_1_figure_supplement_5.pdf]

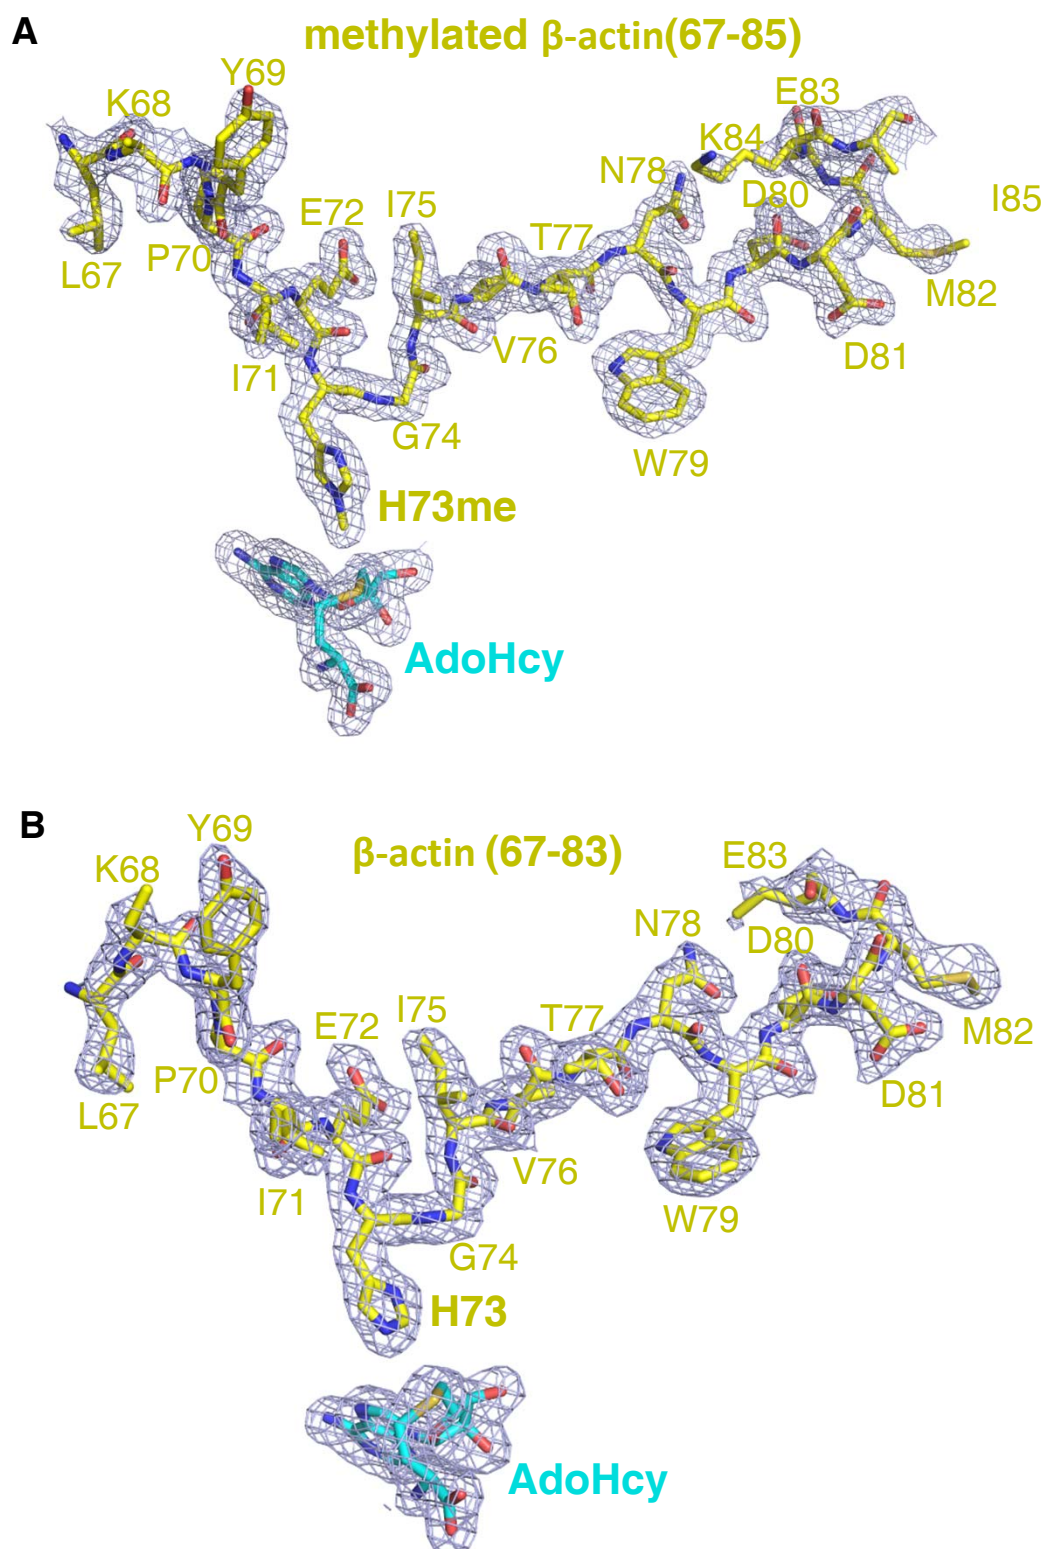

The  $2|F_o|-|F_c|$   $\sigma$ -weighted maps of (A) methylated  $\beta$ -actin peptide and (B) unmodified  $\beta$ -actin peptide in the presence of AdoHcy, are contoured at  $1.2 \sigma$  (blue cage), respectively. The peptides are shown in yellow sticks.

**Figure 1—figure supplement 5**
