# Supplementary material for: Structural insights into SETD3-mediated histidine methylation on β-actin
Source: eLife journal article supplement (doi:10.7554/elife.43676), 2019-02-20
Supplement: supp [file elife-43676-supp-v1.zip › elife_poa_e43676_Figure_1_figure_supplement_7.pdf]

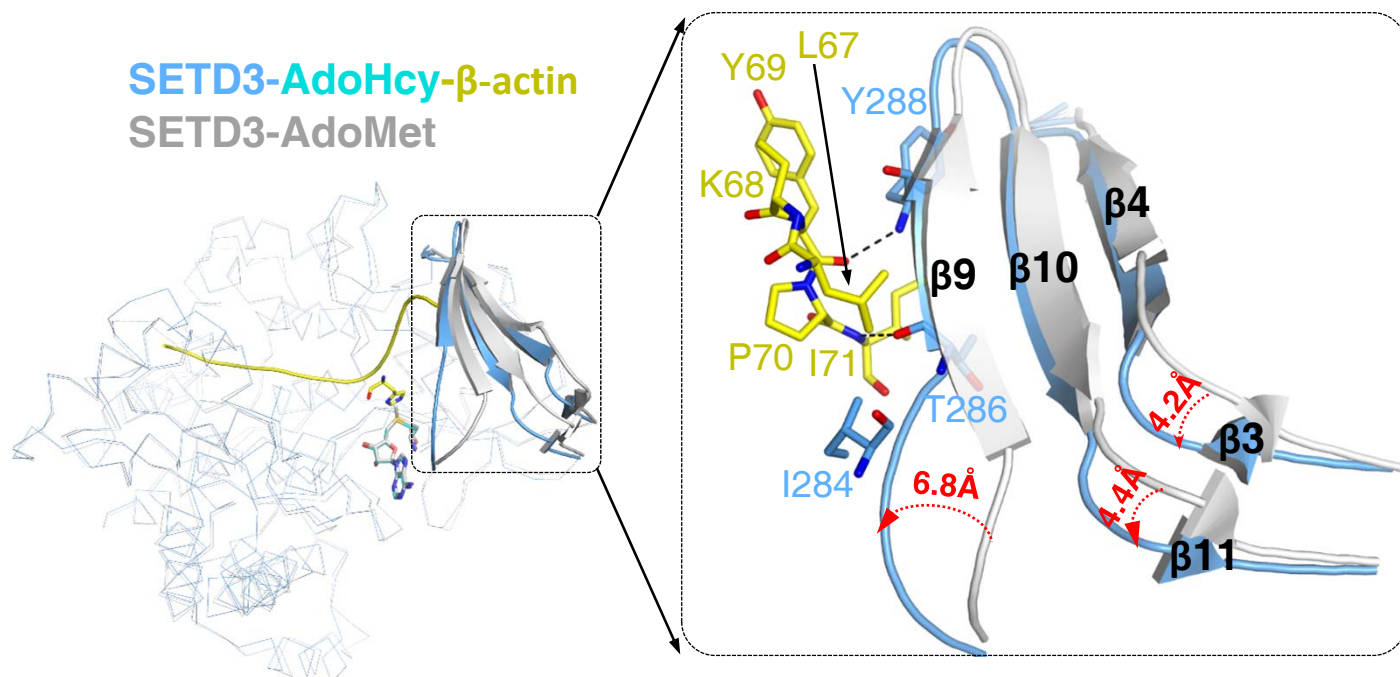

**Superposition of AdoMet-bound SETD3 (PDB id: 3SMT) with AdoHcy bound SETD3-actin.** In the structure of AdoMet bound SETD3, the protein is shown in grey ribbon and AdoMet is shown in grey sticks. In the structure of AdoHcy bound SETD3 in the presence of actin, protein is shown in blue ribbon and AdoHcy is shown in yellow sticks.  $\beta$ 4- $\beta$ 9- $\beta$ 10 and  $\beta$ 3- $\beta$ 11 changed conformations significantly upon binding to actin peptide, which are shown in cartoon representation. Leu67-Ile71 of  $\beta$ -actin and their interaction residues in SETD3, are shown in sticks. Three loops that precede  $\beta$ 4,  $\beta$ 9 and  $\beta$ 11 shift 4.2Å, 4.4Å, and 6.8Å, respectively.

**Figure 1–figure supplement 7**
