# Supplementary material for: Structural insights into SETD3-mediated histidine methylation on β-actin
Source: eLife journal article supplement (doi:10.7554/elife.43676), 2019-02-20
Supplement: supp [file elife-43676-supp-v1.zip › elife_poa_e43676_Figure_1_figure_supplement_8.pdf]

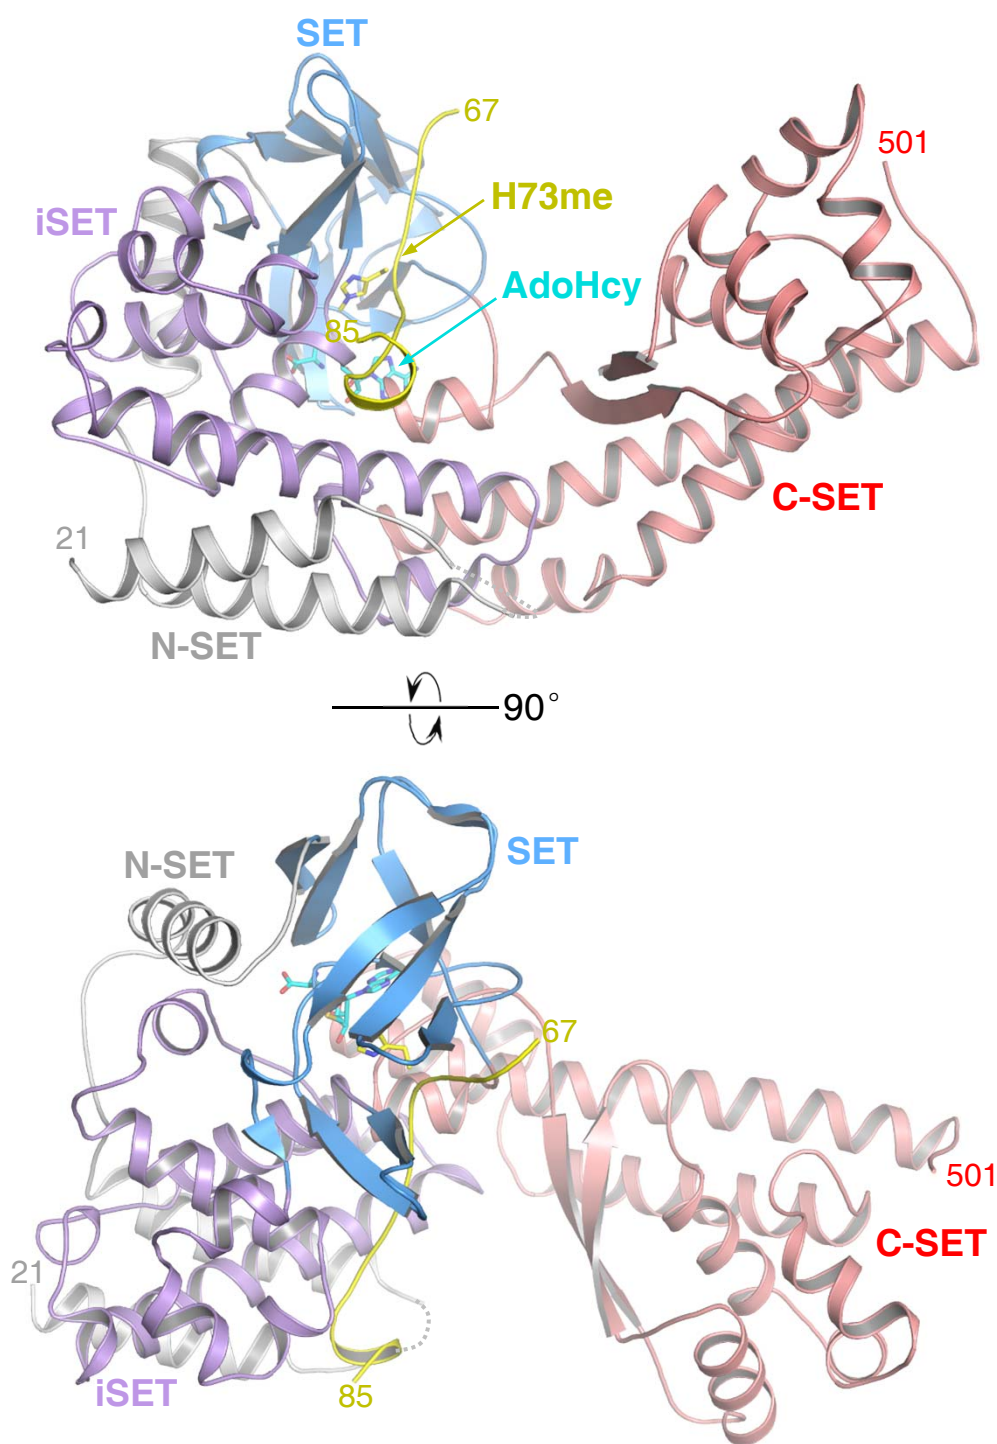

**Overall structure of SETD3 with methylated  $\beta$ -actin peptide in the presence of AdoHcy.** SETD3 is colored and labelled in the same mode as shown in Figure 1C. AdoHcy and His73me are shown in sticks.
