# Supplementary material for: Structural insights into SETD3-mediated histidine methylation on β-actin
Source: eLife journal article supplement (doi:10.7554/elife.43676), 2019-02-20
Supplement: supp [file elife-43676-supp-v1.zip › elife_poa_e43676_Figure_2_figure_supplement_2.pdf]

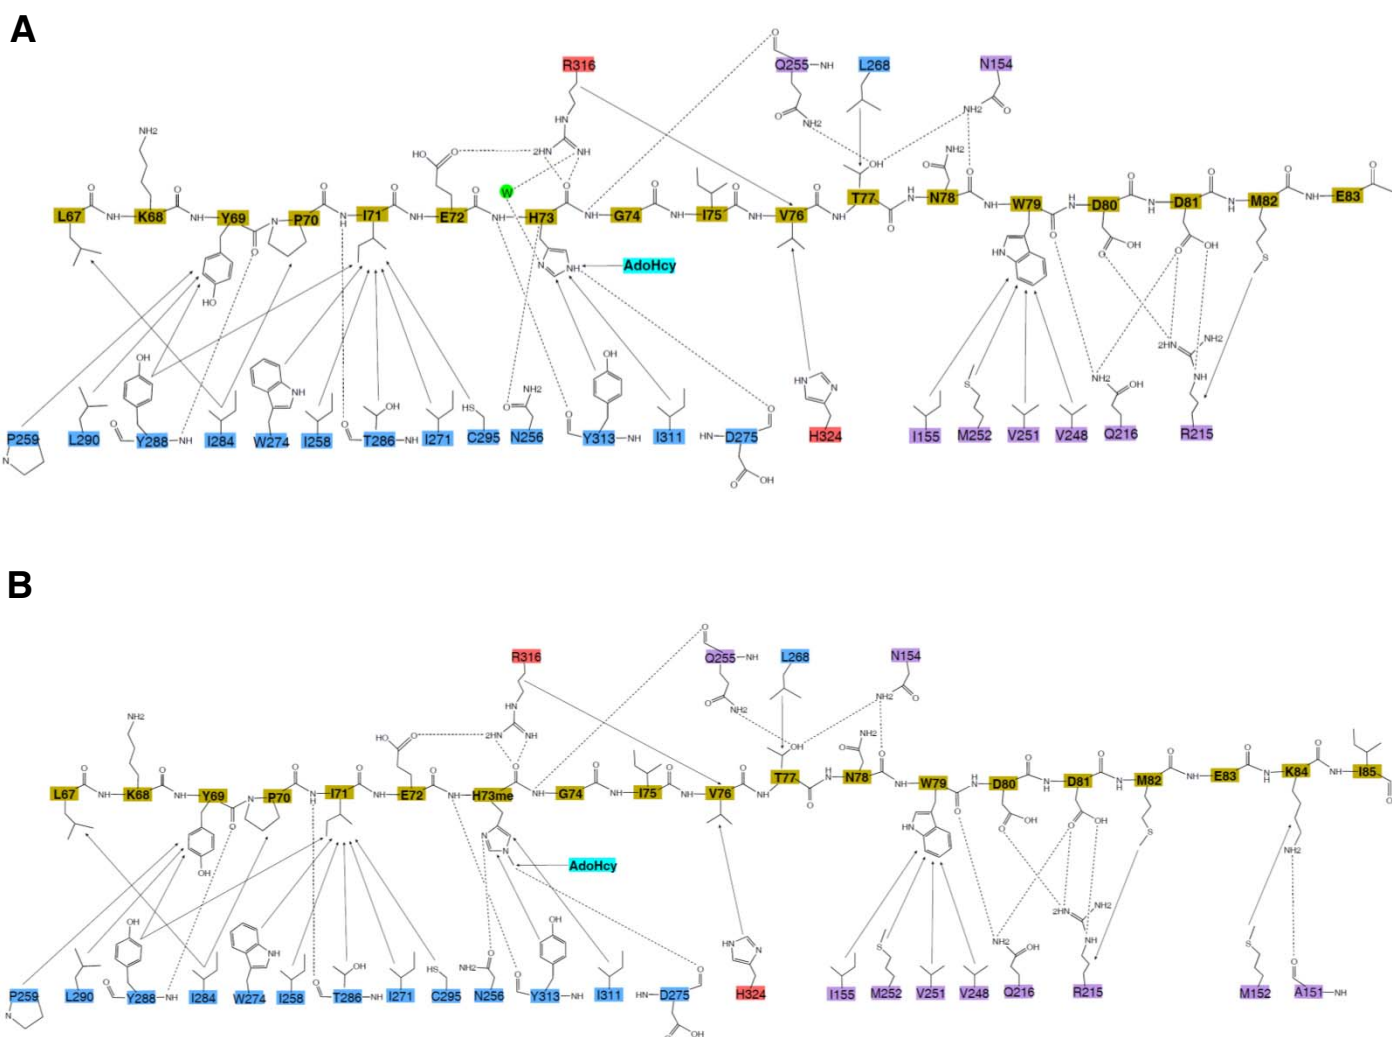

**Schematic of the detailed interactions (A) between SETD3 and unmodified  $\beta$ -actin (B) and between SETD3 and methylated  $\beta$ -actin.** SETD3 residues are colored as shown in Figure 1A, while the peptide residues are colored in yellow. The hydrophobic interactions and hydrogen bonds between protein and peptide are shown in black solid arrows and black dash arrows, respectively.
