# Supplementary material for: Structural insights into SETD3-mediated histidine methylation on β-actin
Source: eLife journal article supplement (doi:10.7554/elife.43676), 2019-02-20
Supplement: supp [file elife-43676-supp-v1.zip › elife_poa_e43676_Figure_2_figure_supplement_3.pdf]

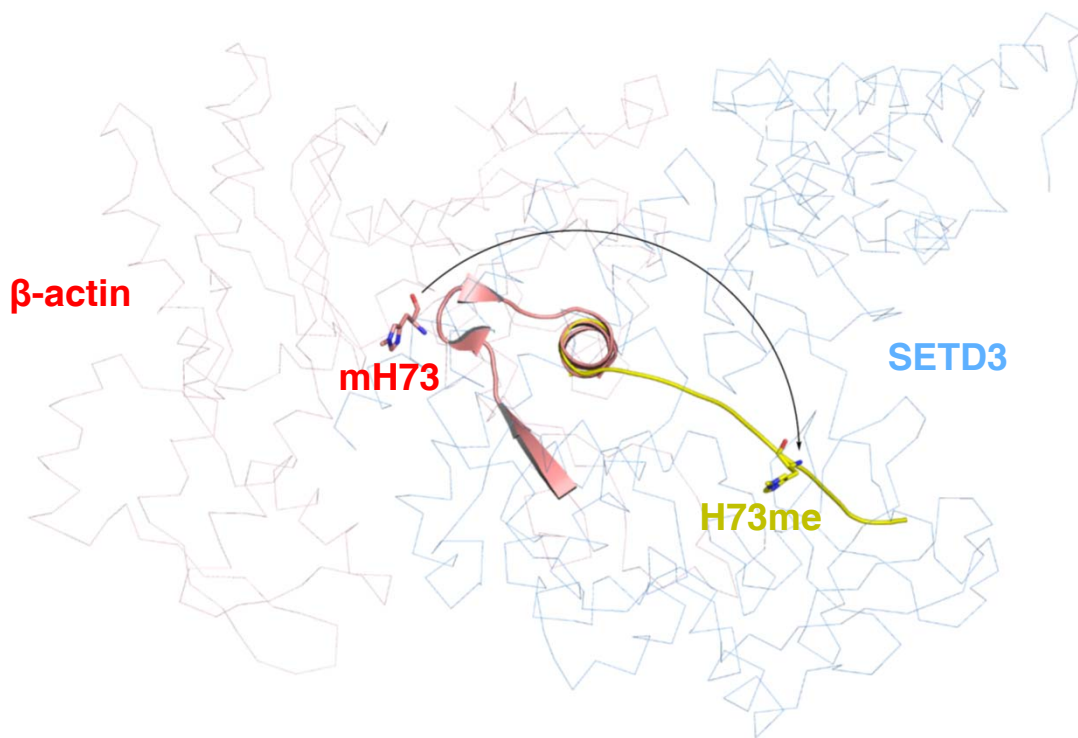

**Actin endures conformational changes upon binding to SETD3.**  $\beta$ -actin peptide (66-88, yellow cartoon) is overlaid with the same fragment in the structure of native  $\beta$ -actin (red cartoon) (PDB id: 1HLU). native  $\beta$ -actin decomposes its local secondary structures upon SETD3 binding. Native  $\beta$ -actin and SETD3 are shown in red and blue ribbon, respectively.

**Figure 2—figure supplement 3**
