# Supplementary material for: Structural insights into SETD3-mediated histidine methylation on β-actin
Source: eLife journal article supplement (doi:10.7554/elife.43676), 2019-02-20
Supplement: supp [file elife-43676-supp-v1.zip › elife_poa_e43676_Figure_3_source_data_1.xlsx]

## Sheet: the mean
	Figure 3 – Source Data 1. Radiochemical measurements of SETD3-dependent methylation of either human recombinant beta-actin or its mutated form (H73A) in the presence of increasing pH value of the reaction mixture.
				Experiment 1						Experiment 2						Experiment 3
	Sample	cpm	pmol	pmol µg-1 protein	pmol min-1 µg-1 protein		Sample	cpm	pmol	pmol µg-1 protein	pmol min-1 µg-1 protein		Sample	cpm	pmol	pmol µg-1 protein	pmol min-1 µg-1 protein
	+ Actin						+ Actin						+ Actin
	pH 6.0	16905.6	3.74977	74.9954	7.49954		pH 6.0	16166.7	3.82385	76.477	7.6477		pH 6.0	13538.9	3.07095	61.419	6.1419
	pH 6.5	29776.7	6.60467	132.093	13.2093		pH 6.5	28851.1	6.82406	136.481	13.6481		pH 6.5	23106.7	5.24115	104.823	10.4823
	pH 7.0	31715.6	7.03473	140.695	14.0695		pH 7.0	27496.7	6.5037	130.074	13.0074		pH 7.0	26468.9	6.00379	120.076	12.0076
	pH 7.5	34210	7.58802	151.76	15.176		pH 7.5	32430	7.67057	153.411	15.3411		pH 7.5	29048.9	6.58899	131.78	13.178
	pH 8.0	38603.3	8.56249	171.25	17.125		pH 8.0	36953.3	8.74046	174.809	17.4809		pH 8.0	31852.2	7.22486	144.497	14.4497
	pH 8.5	41695.6	9.24836	184.967	18.4967		pH 8.5	41071.1	9.71442	194.288	19.4288		pH 8.5	34415.6	7.80628	156.126	15.6126
	pH 9.0	40811.1	9.05219	181.044	18.1044		pH 9.0	41491.1	9.81376	196.275	19.6275		pH 9.0	35614.4	8.07822	161.564	16.1564
	+ H73A						+ H73A						+ H73A
	pH 6.0	138.889	0.0308065	0.61613	0.061613		pH 6.0	157.778	0.0373187	0.746374	0.0746374		pH 6.0	141.111	0.0320074	0.640148	0.0640148
	pH 6.5	167.778	0.0372143	0.744286	0.0744286		pH 6.5	278.889	0.0659647	1.31929	0.131929		pH 6.5	181.111	0.0410804	0.821608	0.0821608
	pH 7.0	256.667	0.0569305	1.13861	0.113861		pH 7.0	243.333	0.0575549	1.1511	0.11511		pH 7.0	225.556	0.0511615	1.02323	0.102323
	pH 7.5	332.222	0.0736892	1.47378	0.147378		pH 7.5	334.444	0.0791051	1.5821	0.15821		pH 7.5	310	0.0703155	1.40631	0.140631
	pH 8.0	395.556	0.087737	1.75474	0.175474		pH 8.0	348.889	0.0825216	1.65043	0.165043		pH 8.0	390	0.0884615	1.76923	0.176923
	pH 8.5	212.222	0.0470724	0.941447	0.0941447		pH 8.5	222.222	0.0525615	1.05123	0.105123		pH 8.5	172.222	0.0390642	0.781283	0.0781283
	pH 9.0	187.778	0.0416504	0.833008	0.0833008		pH 9.0	202.222	0.047831	0.95662	0.095662		pH 9.0	174.444	0.0395682	0.791365	0.0791365
	Sample	Mean	(pmol min-1 µg-1 protein)		SD	SEM
	+ Actin
	pH 6.0	7.09638			0.829919	0.479154
	pH 6.5	12.4466			1.71521	0.990277
	pH 7.0	13.0281			1.0311	0.595307
	pH 7.5	14.565			1.20407	0.695168
	pH 8.0	16.3519			1.6569	0.956611
	pH 8.5	17.846			1.98961	1.1487
	pH 9.0	17.9628			1.73987	1.00451
	+ H73A
	pH 6.0	0.0667551			0.00693108	0.00400166
	pH 6.5	0.0961729			0.0312064	0.018017
	pH 7.0	0.110431			0.00704966	0.00407012
	pH 7.5	0.14874			0.0088683	0.00512012
	pH 8.0	0.17248			0.00648111	0.00374187
	pH 8.5	0.0924654			0.0135755	0.0078378
	pH 9.0	0.0860331			0.00859488	0.00496226
	6
	6.5
	7
	7.5
	8
	8.5
	9
