# Supplementary material for: Structural insights into SETD3-mediated histidine methylation on β-actin
Source: eLife journal article supplement (doi:10.7554/elife.43676), 2019-02-20
Supplement: supp [file elife-43676-supp-v1.zip › elife_poa_e43676_Table_3_source_data_1.xlsx]

## Sheet: WT
Table 3. Kinetic properties of the wild-type and specific mutant forms of human SETD3 protein (for beta-actin as the substrate).
The calculation of kinetic parameters were performed with Prism 8.0 (GraphPad Software) using a nonlinear regression.
β-actin [μM]	SETD3 WT (nmol/min/mg)
5	13.05	12.21	10.95
2.5	11.87	11.16	10.62
1	10.18	9.61	8.88
0.5	7.06	7.3	6.42
0.4	6.4	6.28	5.81
0.3	5.08	4.22	4.65
0.1	1.81	1.66	1.6
0	0	0	0
Michaelis-Menten			kcat
Best-fit values			Best-fit values
Vmax	13.55		Et	16.74
Km	0.5025		kcat	0.8092
Std. Error			Km	0.5025
Vmax	0.3643		Vmax	13.55
Km	0.04149		Std. Error
95% CI (profile likelihood)			kcat	0.02176
Vmax	12.83 to 14.30		Km	0.04149
Km	0.4250 to 0.5920		95% CI (profile likelihood)
Goodness of Fit			kcat	0.7662 to 0.8545
Degrees of Freedom	22		Km	0.4250 to 0.5920
R squared	0.9811		Goodness of Fit
Sum of Squares	7.545		Degrees of Freedom	22
Sy.x	0.5856		R squared	0.9811
Constraints			Sum of Squares	7.545
Km	Km > 0		Sy.x	0.5856
			Constraints
Number of points			Et	Et = 16.74
# of X values	24
# Y values analyzed	24		Number of points
			# of X values	24
			# Y values analyzed	24

## Sheet: R75A
Table 3. Kinetic properties of the wild-type and specific mutant forms of human SETD3 protein (for beta-actin as the substrate).
The calculation of kinetic parameters were performed with Prism 8.0 (GraphPad Software) using a nonlinear regression.
β-actin [μM]	SETD3 R75A (nmol/min/mg)
5	0.034	0.03	0.03
2.5	0.03	0.034	0.033
1	0.029	0.019	0.024
0.5	0.02	0.018	0.018
0.4	0.015	0.012	0.016
0.3	0.013	0.01	0.013
0.1	0.005	0.005	0.004
0	0	0	0
Michaelis-Menten			kcat
Best-fit values			Best-fit values
Vmax	0.03702		Et	16.77
Km	0.5654		kcat	0.002208
Std. Error			Km	0.5654
Vmax	0.001556		Vmax	0.03702
Km	0.07073		Std. Error
95% CI (profile likelihood)			kcat	9.281e-05
Vmax	0.03400 to 0.04032		Km	0.07073
Km	0.4382 to 0.7242		95% CI (profile likelihood)
Goodness of Fit			kcat	0.002027 to 0.002404
Degrees of Freedom	22		Km	0.4382 to 0.7242
R squared	0.9581		Goodness of Fit
Sum of Squares	0.0001251		Degrees of Freedom	22
Sy.x	0.002385		R squared	0.9581
Constraints			Sum of Squares	0.0001251
Km	Km > 0		Sy.x	0.002385
			Constraints
Number of points			Et	Et = 16.77
# of X values	24
# Y values analyzed	24		Number of points
			# of X values	24
			# Y values analyzed	24

## Sheet: R215A
Table 3. Kinetic properties of the wild-type and specific mutant forms of human SETD3 protein (for beta-actin as the substrate).
The calculation of kinetic parameters were performed with Prism 8.0 (GraphPad Software) using a nonlinear regression.
β-actin [μM]	SETD3 R215A (nmol/min/mg)
7.5	3.201	3.122	2.929
2.5	2.597	2.521	2.342
1	1.876	1.837	1.58
0.5	1.104	1.196	1.042
0.4	0.93	0.975	0.91
0.3	0.707	0.749	0.713
0.1	0.286	0.239	0.251
0	0	0	0
Michaelis-Menten			kcat
Best-fit values			Best-fit values
Vmax	3.553		Et	16.77
Km	1.087		kcat	0.2119
Std. Error			Km	1.087
Vmax	0.0684		Vmax	3.553
Km	0.05587		Std. Error
95% CI (profile likelihood)			kcat	0.004078
Vmax	3.416 to 3.697		Km	0.05587
Km	0.9788 to 1.208		95% CI (profile likelihood)
Goodness of Fit			kcat	0.2037 to 0.2205
Degrees of Freedom	22		Km	0.9788 to 1.208
R squared	0.9932		Goodness of Fit
Sum of Squares	0.1667		Degrees of Freedom	22
Sy.x	0.08705		R squared	0.9932
Constraints			Sum of Squares	0.1667
Km	Km > 0		Sy.x	0.08705
			Constraints
Number of points			Et	Et = 16.77
# of X values	24
# Y values analyzed	24		Number of points
			# of X values	24
			# Y values analyzed	24

## Sheet: N256A
Table 3. Kinetic properties of the wild-type and specific mutant forms of human SETD3 protein (for beta-actin as the substrate).
The calculation of kinetic parameters were performed with Prism 8.0 (GraphPad Software) using a nonlinear regression.
β-actin [μM]	SETD3 N256A (nmol/min/mg)
7.5	0.491	0.473	0.447
2.5	0.431	0.473	0.395
1	0.377	0.378	0.373
0.5	0.28	0.301	0.264
0.4	0.254	0.268	0.236
0.3	0.227	0.212	0.088
0.1	0.088	0.087	0.043
0	0	0	0
Michaelis-Menten			kcat
Best-fit values			Best-fit values
Vmax	0.5116		Et	16.75
Km	0.449		kcat	0.03054
Std. Error			Km	0.449
Vmax	0.01883		Vmax	0.5116
Km	0.05309		Std. Error
95% CI (profile likelihood)			kcat	0.001124
Vmax	0.4745 to 0.5508		Km	0.05309
Km	0.3526 to 0.5654		95% CI (profile likelihood)
Goodness of Fit			kcat	0.02833 to 0.03288
Degrees of Freedom	22		Km	0.3526 to 0.5654
R squared	0.9593		Goodness of Fit
Sum of Squares	0.02492		Degrees of Freedom	22
Sy.x	0.03366		R squared	0.9593
Constraints			Sum of Squares	0.02492
Km	Km > 0		Sy.x	0.03366
			Constraints
Number of points			Et	Et = 16.75
# of X values	24
# Y values analyzed	24		Number of points
			# of X values	24
			# Y values analyzed	24

## Sheet: N256D
Table 3. Kinetic properties of the wild-type and specific mutant forms of human SETD3 protein (for beta-actin as the substrate).
The calculation of kinetic parameters were performed with Prism 8.0 (GraphPad Software) using a nonlinear regression.
β-actin [μM]	SETD3 N256D (nmol/min/mg)
7.5	0.94	0.947	0.894
2.5	0.881	0.855	0.818
1	0.791	0.761	0.734
0.5	0.619	0.621	0.603
0.4	0.595	0.583	0.574
0.3	0.504	0.489	0.482
0.1	0.155	0.188	0.17
0	0	0	0
Michaelis-Menten			kcat
Best-fit values			Best-fit values
Vmax	0.9734		Et	16.74
Km	0.3045		kcat	0.05815
Std. Error			Km	0.3045
Vmax	0.01736		Vmax	0.9734
Km	0.01958		Std. Error
95% CI (profile likelihood)			kcat	0.001037
Vmax	0.9387 to 1.009		Km	0.01958
Km	0.2673 to 0.3455		95% CI (profile likelihood)
Goodness of Fit			kcat	0.05608 to 0.06028
Degrees of Freedom	22		Km	0.2673 to 0.3455
R squared	0.9881		Goodness of Fit
Sum of Squares	0.02625		Degrees of Freedom	22
Sy.x	0.03454		R squared	0.9881
Constraints			Sum of Squares	0.02625
Km	Km > 0		Sy.x	0.03454
			Constraints
Number of points			Et	Et = 16.74
# of X values	24
# Y values analyzed	24		Number of points
			# of X values	24
			# Y values analyzed	24

## Sheet: N256Q 
Table 3. Kinetic properties of the wild-type and specific mutant forms of human SETD3 protein (for beta-actin as the substrate).
The calculation of kinetic parameters were performed with Prism 8.0 (GraphPad Software) using a nonlinear regression.
β-actin [μM]	SETD3 N256Q (nmol/min/mg)
7.5	10.084	9.712	9.428
2.5	8.547	8.426	8.101
1	6.579	6.12	6.085
0.5	4.294	4.004	4.072
0.4	3.681	3.704	3.366
0.3	3.314	2.908	2.396
0.1	1.568	1.318	1.385
0	0	0	0
Michaelis-Menten			kcat
Best-fit values			Best-fit values
Vmax	10.86		Et	16.74
Km	0.7837		kcat	0.6487
Std. Error			Km	0.7837
Vmax	0.172		Vmax	10.86
Km	0.03516		Std. Error
95% CI (profile likelihood)			kcat	0.01027
Vmax	10.51 to 11.22		Km	0.03516
Km	0.7143 to 0.8592		95% CI (profile likelihood)
Goodness of Fit			kcat	0.6278 to 0.6702
Degrees of Freedom	22		Km	0.7143 to 0.8592
R squared	0.9941		Goodness of Fit
Sum of Squares	1.412		Degrees of Freedom	22
Sy.x	0.2533		R squared	0.9941
Constraints			Sum of Squares	1.412
Km	Km > 0		Sy.x	0.2533
			Constraints
Number of points			Et	Et = 16.74
# of X values	24
# Y values analyzed	24		Number of points
			# of X values	24
			# Y values analyzed	24

## Sheet: N278A
Table 3. Kinetic properties of the wild-type and specific mutant forms of human SETD3 protein (for beta-actin as the substrate).
The calculation of kinetic parameters were performed with Prism 8.0 (GraphPad Software) using a nonlinear regression.
β-actin [μM]	SETD3 N278A (nmol/min/mg)
7.5	0.021	0.021	0.02
2.5	0.019	0.019	0.018
1	0.017	0.018	0.017
0.5	0.017	0.016	0.016
0.4	0.015	0.017	0.015
0.3	0.016	0.016	0.015
0.1	0.014	0.014	0.014
0	0	0	0
Michaelis-Menten			kcat
Best-fit values			Best-fit values
Vmax	0.01881		Et	16.75
Km	0.04692		kcat	0.001123
Std. Error			Km	0.04692
Vmax	0.0004015		Vmax	0.01881
Km	0.008564		Std. Error
95% CI (profile likelihood)			kcat	2.397e-05
Vmax	0.01796 to 0.01970		Km	0.008564
Km	0.02939 to 0.06813		95% CI (profile likelihood)
Goodness of Fit			kcat	0.001072 to 0.001176
Degrees of Freedom	22		Km	0.02939 to 0.06813
R squared	0.9636		Goodness of Fit
Sum of Squares	3.072e-05		Degrees of Freedom	22
Sy.x	0.001182		R squared	0.9636
Constraints			Sum of Squares	3.072e-05
Km	Km > 0		Sy.x	0.001182
			Constraints
Number of points			Et	Et = 16.75
# of X values	24
# Y values analyzed	24		Number of points
			# of X values	24
			# Y values analyzed	24

## Sheet: Y313F
Table 3. Kinetic properties of the wild-type and specific mutant forms of human SETD3 protein (for beta-actin as the substrate).
The calculation of kinetic parameters were performed with Prism 8.0 (GraphPad Software) using a nonlinear regression.
β-actin [μM]	SETD3 Y313F (nmol/min/mg)
7.5	0.361	0.331	0.339
2.5	0.306	0.29	0.278
1	0.244	0.229	0.232
0.5	0.169	0.176	0.173
0.4	0.15	0.149	0.148
0.3	0.125	0.122	0.127
0.1	0.046	0.049	0.057
0	0	0	0
Michaelis-Menten			kcat
Best-fit values			Best-fit values
Vmax	0.367		Et	16.75
Km	0.581		kcat	0.02191
Std. Error			Km	0.581
Vmax	0.004747		Vmax	0.367
Km	0.02266		Std. Error
95% CI (profile likelihood)			kcat	0.0002834
Vmax	0.3572 to 0.3769		Km	0.02266
Km	0.5356 to 0.6296		95% CI (profile likelihood)
Goodness of Fit			kcat	0.02133 to 0.02250
Degrees of Freedom	22		Km	0.5356 to 0.6296
R squared	0.9953		Goodness of Fit
Sum of Squares	0.001343		Degrees of Freedom	22
Sy.x	0.007814		R squared	0.9953
Constraints			Sum of Squares	0.001343
Km	Km > 0		Sy.x	0.007814
			Constraints
Number of points			Et	Et = 16.75
# of X values	24
# Y values analyzed	24		Number of points
			# of X values	24
			# Y values analyzed	24

## Sheet: R316A
Table 3. Kinetic properties of the wild-type and specific mutant forms of human SETD3 protein (for beta-actin as the substrate).
The calculation of kinetic parameters were performed with Prism 8.0 (GraphPad Software) using a nonlinear regression.
β-actin [μM]	SETD3 R316A (nmol/min/mg)
7.5	2.577	2.627	2.373
2.5	2.047	2.002	1.992
1	1.41	1.347	1.302
0.5	0.957	0.944	0.839
0.4	0.844	0.806	0.745
0.3	0.614	0.627	0.579
0.1	0.122	0.244	0.198
0	0	0	0
Michaelis-Menten			kcat
Best-fit values			Best-fit values
Vmax	2.903		Et	16.77
Km	1.115		kcat	0.1731
Std. Error			Km	1.115
Vmax	0.04765		Vmax	2.903
Km	0.04863		Std. Error
95% CI (profile likelihood)			kcat	0.002842
Vmax	2.806 to 3.003		Km	0.04863
Km	1.018 to 1.220		95% CI (profile likelihood)
Goodness of Fit			kcat	0.1673 to 0.1791
Degrees of Freedom	22		Km	1.018 to 1.220
R squared	0.9951		Goodness of Fit
Sum of Squares	0.07896		Degrees of Freedom	22
Sy.x	0.05991		R squared	0.9951
Constraints			Sum of Squares	0.07896
Km	Km > 0		Sy.x	0.05991
			Constraints
Number of points			Et	Et = 16.77
# of X values	24
# Y values analyzed	24		Number of points
			# of X values	24
			# Y values analyzed	24
