# Supplementary material for: Structural insights into SETD3-mediated histidine methylation on β-actin
Source: eLife journal article supplement (doi:10.7554/elife.43676), 2019-02-20
Supplement: supp [file elife-43676-supp-v1.zip › elife_poa_e43676_Table_3_source_data_2.xlsx]

## Sheet: WT
Table 3. Kinetic properties of the wild-type and specific mutant forms of human SETD3 protein (for AdoMet as the substrate).
The calculation of kinetic parameters were performed with Prism 8.0 (GraphPad Software) using a nonlinear regression.
AdoMet [μM]	SETD3 WT (nmol/min/mg)
0	0	0	0
0.1	5.68	5.435	4.594
0.2	8.651	7.478	6.574
0.3	9.043	8.231	6.599
0.5	10.284	9.655	8.065
1	11.054	10.187	8.737
2	11.644	11.305	9.342
Best-fit values			kcat
Vmax	11.26		Best-fit values
Km	0.1107		Et	16.74
Std. Error			kcat	0.6728
Vmax	0.4657		Km	0.1107
Km	0.01999		Vmax	11.26
95% CI (profile likelihood)			Std. Error
Vmax	10.33 to 12.28		kcat	0.02782
Km	0.07351 to 0.1580		Km	0.01999
Goodness of Fit			95% CI (profile likelihood)
Degrees of Freedom	19		kcat	0.6171 to 0.7338
R squared	0.9418		Km	0.07351 to 0.1580
Sum of Squares	15.05		Goodness of Fit
Sy.x	0.8899		Degrees of Freedom	19
Constraints			R squared	0.9418
Km	Km > 0		Sum of Squares	15.05
			Sy.x	0.8899
Number of points			Constraints
# of X values	21		Et	Et = 16.74
# Y values analyzed	21
# Y values analyzed	21		Number of points
			# of X values	21
			# Y values analyzed	21

## Sheet: R75A
Table 3. Kinetic properties of the wild-type and specific mutant forms of human SETD3 protein (for AdoMet as the substrate).
The calculation of kinetic parameters were performed with Prism 8.0 (GraphPad Software) using a nonlinear regression.
AdoMet [μM]	SETD3 R75A (nmol/min/mg)
0	0	0	0
0.1	0.01	0.011	0.009
0.2	0.019	0.016	0.016
0.3	0.026	0.024	0.018
0.5	0.036	0.035	0.025
1	0.059	0.059	0.044
2	0.108	0.104	0.076
Michaelis-Menten			kcat
Best-fit values			Best-fit values
Vmax	0.2654		Et	16.77
Km	3.601		kcat	0.01583
Std. Error			Km	3.601
Vmax	0.07166		Vmax	0.2654
Km	1.363		Std. Error
95% CI (profile likelihood)			kcat	0.004273
Vmax	0.1692 to 0.7171		Km	1.363
Km	1.817 to 12.41		95% CI (profile likelihood)
Goodness of Fit			kcat	0.01009 to 0.04276
Degrees of Freedom	19		Km	1.817 to 12.41
R squared	0.9508		Goodness of Fit
Sum of Squares	0.0009872		Degrees of Freedom	19
Sy.x	0.007208		R squared	0.9508
Constraints			Sum of Squares	0.0009872
Km	Km > 0		Sy.x	0.007208
			Constraints
Number of points			Et	Et = 16.77
# of X values	21
# Y values analyzed	21		Number of points
			# of X values	21
			# Y values analyzed	21

## Sheet: R215A
Table 3. Kinetic properties of the wild-type and specific mutant forms of human SETD3 protein (for AdoMet as the substrate).
The calculation of kinetic parameters were performed with Prism 8.0 (GraphPad Software) using a nonlinear regression.
AdoMet [μM]	SETD3 R215A (nmol/min/mg)
0	0	0	0
0.1	1.46	1.26	1.371
0.2	2.159	1.934	1.978
0.3	2.449	2.352	2.323
0.5	2.891	2.703	2.654
1	3.303	3.093	2.973
2	3.732	3.315	3.155
Michaelis-Menten			kcat
Best-fit values			Best-fit values
Vmax	3.666		Et	16.77
Km	0.1654		kcat	0.2186
Std. Error			Km	0.1654
Vmax	0.07832		Vmax	3.666
Km	0.01297		Std. Error
95% CI (profile likelihood)			kcat	0.00467
Vmax	3.506 to 3.834		Km	0.01297
Km	0.1399 to 0.1943		95% CI (profile likelihood)
Goodness of Fit			kcat	0.2091 to 0.2286
Degrees of Freedom	19		Km	0.1399 to 0.1943
R squared	0.9869		Goodness of Fit
Sum of Squares	0.3263		Degrees of Freedom	19
Sy.x	0.131		R squared	0.9869
Constraints			Sum of Squares	0.3263
Km	Km > 0		Sy.x	0.131
			Constraints
Number of points			Et	Et = 16.77
# of X values	21
# Y values analyzed	21		Number of points
			# of X values	21
			# Y values analyzed	21

## Sheet: N256A
Table 3. Kinetic properties of the wild-type and specific mutant forms of human SETD3 protein (for AdoMet as the substrate).
The calculation of kinetic parameters were performed with Prism 8.0 (GraphPad Software) using a nonlinear regression.
AdoMet [μM]	SETD3 N256A (nmol/min/mg)
0	0	0	0
0.1	0.155	0.135	0.137
0.2	0.265	0.253	0.25
0.3	0.373	0.347	0.306
0.5	0.513	0.486	0.42
1	0.719	0.706	0.646
2	0.878	0.846	0.789
Michaelis-Menten			kcat
Best-fit values			Best-fit values
Vmax	1.136		Et	16.75
Km	0.6858		kcat	0.0678
Std. Error			Km	0.6858
Vmax	0.03827		Vmax	1.136
Km	0.05244		Std. Error
95% CI (profile likelihood)			kcat	0.002285
Vmax	1.061 to 1.220		Km	0.05244
Km	0.5859 to 0.8050		95% CI (profile likelihood)
Goodness of Fit			kcat	0.06332 to 0.07286
Degrees of Freedom	19		Km	0.5859 to 0.8050
R squared	0.9904		Goodness of Fit
Sum of Squares	0.01551		Degrees of Freedom	19
Sy.x	0.02857		R squared	0.9904
Constraints			Sum of Squares	0.01551
Km	Km > 0		Sy.x	0.02857
			Constraints
Number of points			Et	Et = 16.75
# of X values	21
# Y values analyzed	21		Number of points
			# of X values	21
			# Y values analyzed	21

## Sheet: N256D
Table 3. Kinetic properties of the wild-type and specific mutant forms of human SETD3 protein (for AdoMet as the substrate).
The calculation of kinetic parameters were performed with Prism 8.0 (GraphPad Software) using a nonlinear regression.
AdoMet [μM]	SETD3 N256D (nmol/min/mg)
0	0	0	0
0.1	0.279	0.249	0.24
0.2	0.404	0.362	0.348
0.3	0.477	0.418	0.37
0.5	0.572	0.497	0.477
1	0.623	0.567	0.502
2	0.633	0.657	0.592
Michaelis-Menten			kcat
Best-fit values			Best-fit values
Vmax	0.6714		Et	16.74
Km	0.1652		kcat	0.0401
Std. Error			Km	0.1652
Vmax	0.02131		Vmax	0.6714
Km	0.01925		Std. Error
95% CI (profile likelihood)			kcat	0.001273
Vmax	0.6282 to 0.7179		Km	0.01925
Km	0.1281 to 0.2096		95% CI (profile likelihood)
Goodness of Fit			kcat	0.03753 to 0.04289
Degrees of Freedom	19		Km	0.1281 to 0.2096
R squared	0.9713		Goodness of Fit
Sum of Squares	0.02418		Degrees of Freedom	19
Sy.x	0.03567		R squared	0.9713
Constraints			Sum of Squares	0.02418
Km	Km > 0		Sy.x	0.03567
			Constraints
Number of points			Et	Et = 16.74
# of X values	21
# Y values analyzed	21		Number of points
			# of X values	21
			# Y values analyzed	21

## Sheet: N256Q 
Table 3. Kinetic properties of the wild-type and specific mutant forms of human SETD3 protein (for AdoMet as the substrate).
The calculation of kinetic parameters were performed with Prism 8.0 (GraphPad Software) using a nonlinear regression.
AdoMet [μM]	SETD3 N256Q (nmol/min/mg)
0	0	0	0
0.1	3.303	3.158	2.669
0.2	5.026	4.336	3.813
0.3	5.244	4.763	3.817
0.5	5.948	5.568	4.65
1	6.347	5.814	4.988
2	6.589	6.338	5.232
Michaelis-Menten			kcat
Best-fit values			Best-fit values
Vmax	6.368		Et	16.74
Km	0.1026		kcat	0.3804
Std. Error			Km	0.1026
Vmax	0.2658		Vmax	6.368
Km	0.0194		Std. Error
95% CI (profile likelihood)			kcat	0.01588
Vmax	5.838 to 6.948		Km	0.0194
Km	0.06687 to 0.1483		95% CI (profile likelihood)
Goodness of Fit			kcat	0.3487 to 0.4151
Degrees of Freedom	19		Km	0.06687 to 0.1483
R squared	0.939		Goodness of Fit
Sum of Squares	5.116		Degrees of Freedom	19
Sy.x	0.5189		R squared	0.939
Constraints			Sum of Squares	5.116
Km	Km > 0		Sy.x	0.5189
			Constraints
Number of points			Et	Et = 16.74
# of X values	21
# Y values analyzed	21		Number of points
			# of X values	21
			# Y values analyzed	21

## Sheet: N278A
Table 3. Kinetic properties of the wild-type and specific mutant forms of human SETD3 protein (for AdoMet as the substrate).
The calculation of kinetic parameters were performed with Prism 8.0 (GraphPad Software) using a nonlinear regression.
AdoMet [μM]	SETD3 N278A (nmol/min/mg)
0	0	0	0
0.1	0.0046	0.0045	0.0044
0.2	0.0068	0.0066	0.0066
0.3	0.0076	0.0076	0.0078
0.5	0.0104	0.0097	0.0105
1	0.0128	0.0116	0.0126
2	0.0179	0.0149	0.0135
Michaelis-Menten			kcat
Best-fit values			Best-fit values
Vmax	0.0175		Et	16.75
Km	0.3499		kcat	0.001045
Std. Error			Km	0.3499
Vmax	0.0007585		Vmax	0.0175
Km	0.04248		Std. Error
95% CI (profile likelihood)			kcat	4.528e-05
Vmax	0.01596 to 0.01926		Km	0.04248
Km	0.2675 to 0.4553		95% CI (profile likelihood)
Goodness of Fit			kcat	0.0009526 to 0.001150
Degrees of Freedom	19		Km	0.2675 to 0.4553
R squared	0.9681		Goodness of Fit
Sum of Squares	1.538e-05		Degrees of Freedom	19
Sy.x	0.0008996		R squared	0.9681
Constraints			Sum of Squares	1.538e-05
Km	Km > 0		Sy.x	0.0008996
			Constraints
Number of points			Et	Et = 16.75
# of X values	21
# Y values analyzed	21		Number of points
			# of X values	21
			# Y values analyzed	21

## Sheet: Y313F
Table 3. Kinetic properties of the wild-type and specific mutant forms of human SETD3 protein (for AdoMet as the substrate).
The calculation of kinetic parameters were performed with Prism 8.0 (GraphPad Software) using a nonlinear regression.
AdoMet [μM]	SETD3 Y313F (nmol/min/mg)
0	0	0	0
0.1	0.032	0.032	0.028
0.2	0.061	0.057	0.05
0.3	0.082	0.078	0.069
0.5	0.133	0.116	0.108
1	0.225	0.199	0.187
2	0.401	0.392	0.356
Michaelis-Menten			kcat
Best-fit values			Best-fit values
Vmax	1.623		Et	16.75
Km	6.543		kcat	0.0969
Std. Error			Km	6.543
Vmax	0.348		Vmax	1.623
Km	1.736		Std. Error
95% CI (profile likelihood)			kcat	0.02077
Vmax	1.120 to 3.113		Km	1.736
Km	4.052 to 14.03		95% CI (profile likelihood)
Goodness of Fit			kcat	0.06689 to 0.1859
Degrees of Freedom	19		Km	4.052 to 14.03
R squared	0.9898		Goodness of Fit
Sum of Squares	0.003226		Degrees of Freedom	19
Sy.x	0.01303		R squared	0.9898
Constraints			Sum of Squares	0.003226
Km	Km > 0		Sy.x	0.01303
			Constraints
Number of points			Et	Et = 16.75
# of X values	21
# Y values analyzed	21		Number of points
			# of X values	21
			# Y values analyzed	21

## Sheet: R316A
Table 3. Kinetic properties of the wild-type and specific mutant forms of human SETD3 protein (for AdoMet as the substrate).
The calculation of kinetic parameters were performed with Prism 8.0 (GraphPad Software) using a nonlinear regression.
AdoMet [μM]	SETD3 R316A (nmol/min/mg)
0	0	0	0
0.1	1.732	1.624	1.595
0.2	2.362	2.369	2.279
0.3	2.733	2.81	2.684
0.5	3.222	3.211	3.102
1	3.629	3.577	3.556
2	4.074	3.726	3.581
Michaelis-Menten			kcat
Best-fit values			Best-fit values
Vmax	4.099		Et	16.77
Km	0.1485		kcat	0.2444
Std. Error			Km	0.1485
Vmax	0.05401		Vmax	4.099
Km	0.007504		Std. Error
95% CI (profile likelihood)			kcat	0.003221
Vmax	3.988 to 4.214		Km	0.007504
Km	0.1334 to 0.1647		95% CI (profile likelihood)
Goodness of Fit			kcat	0.2378 to 0.2513
Degrees of Freedom	19		Km	0.1334 to 0.1647
R squared	0.9946		Goodness of Fit
Sum of Squares	0.1677		Degrees of Freedom	19
Sy.x	0.09395		R squared	0.9946
Constraints			Sum of Squares	0.1677
Km	Km > 0		Sy.x	0.09395
			Constraints
Number of points			Et	Et = 16.77
# of X values	21
# Y values analyzed	21		Number of points
			# of X values	21
			# Y values analyzed	21
