# Supplementary figures and images for: Structural insights into SETD3-mediated histidine methylation on β-actin
Source: eLife journal article supplement (doi:10.7554/elife.43676), 2019-02-20

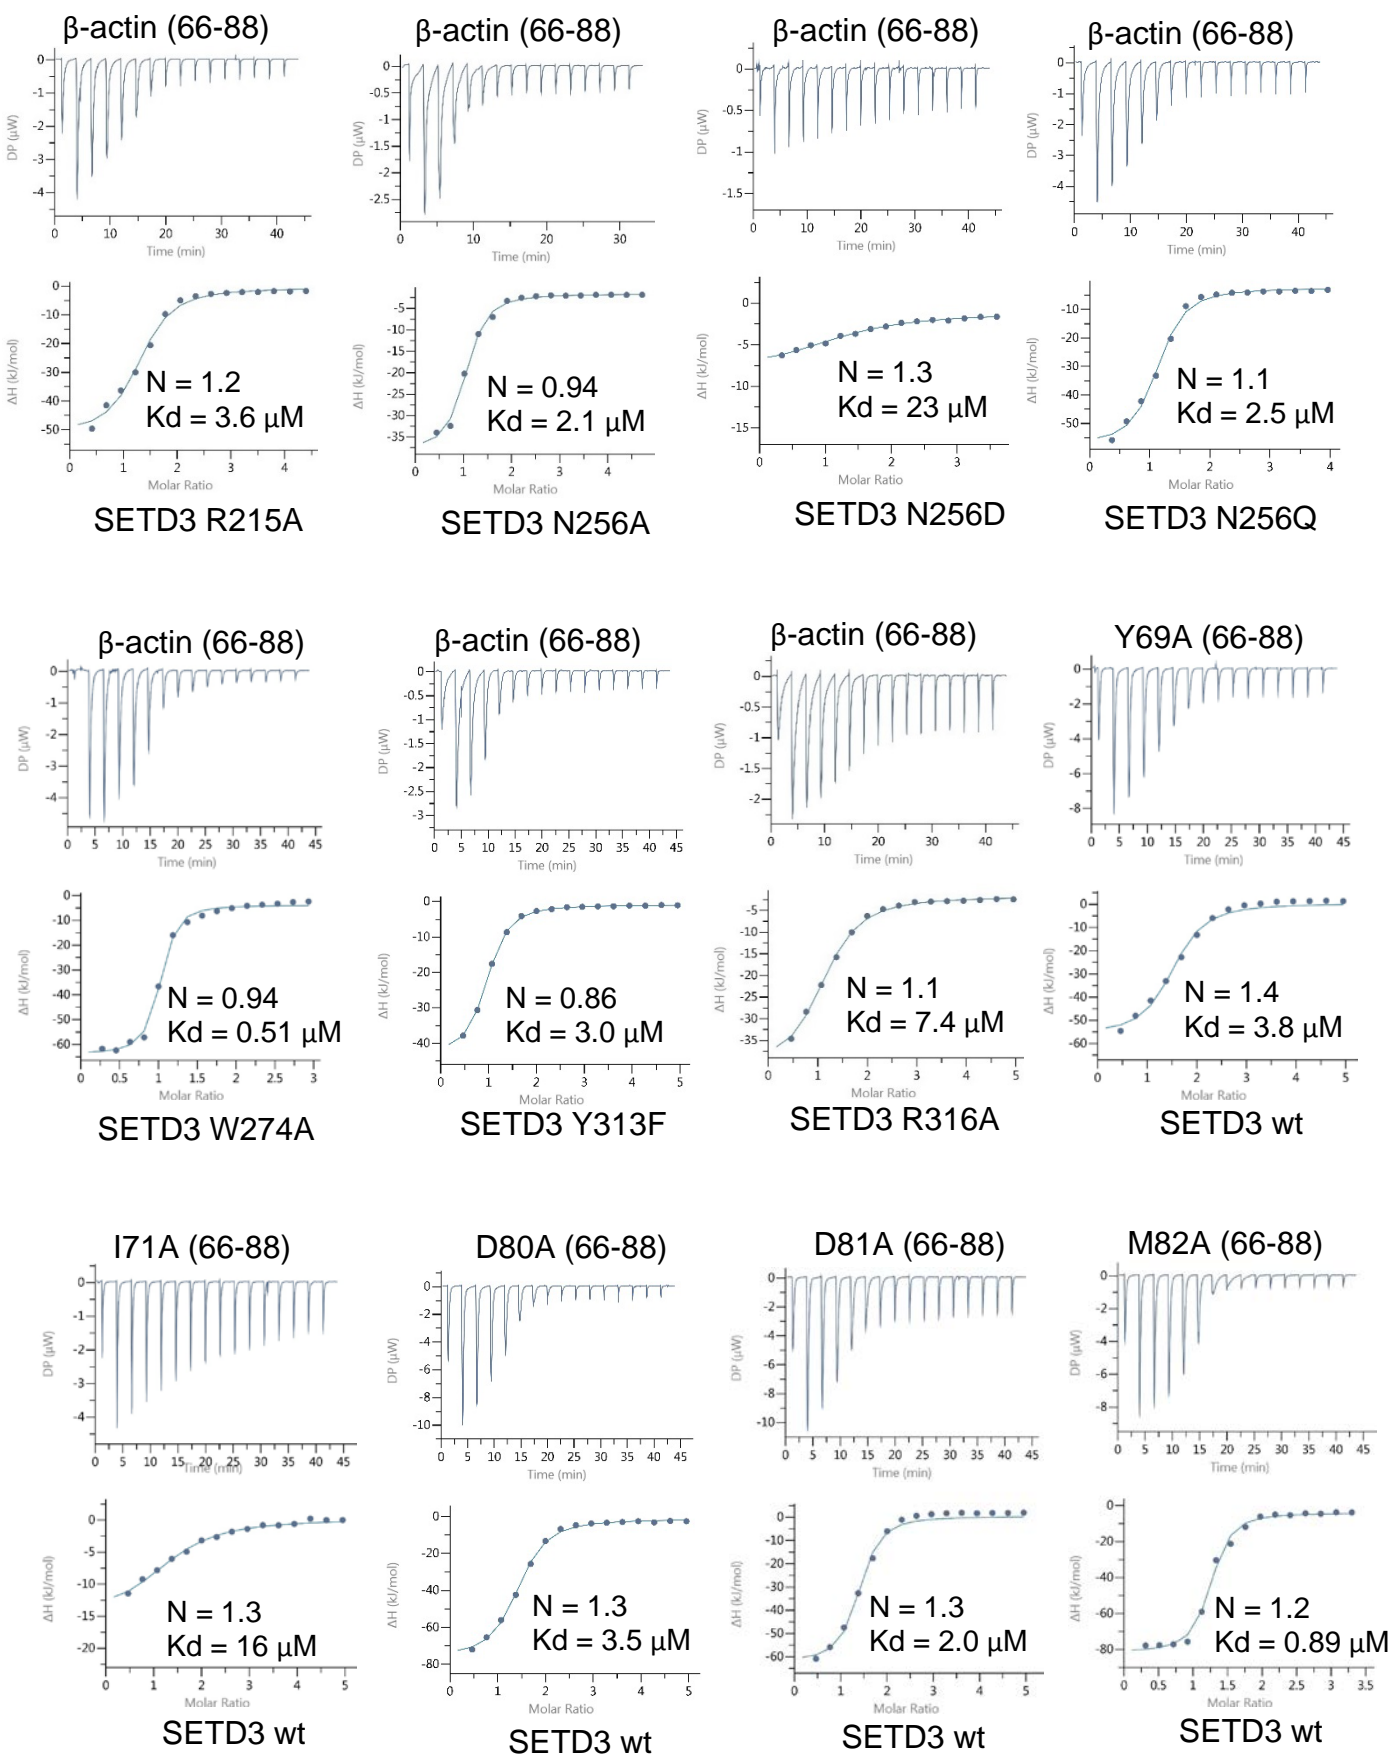

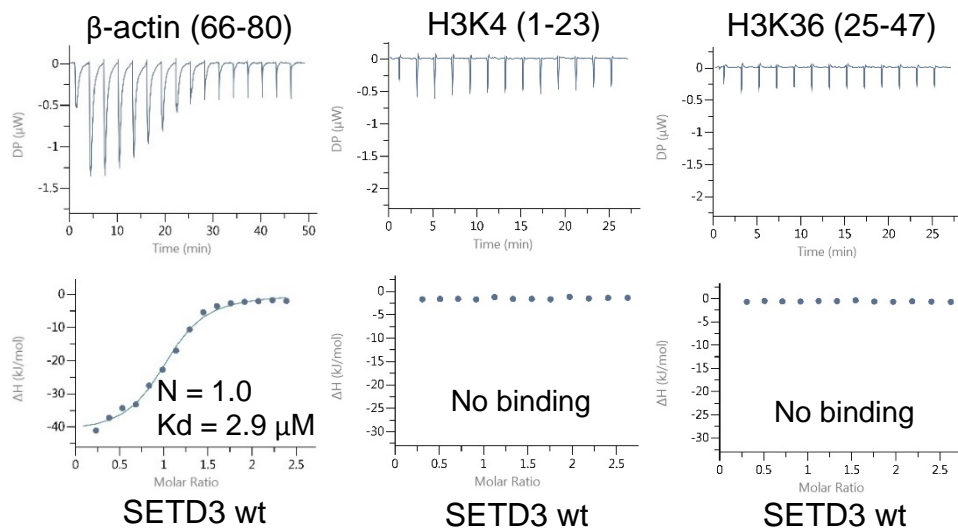

**Supplemental File 1.** ITC binding curves for the binding measurements reported in Table 1.

Supplement: supp [file elife-43676-supp-v1.zip › elife_poa_e43676_Supplementary_file_1.pdf]
